# Supplementary material for: Improving Access to Antimicrobial Prescribing Guidelines in 4 African Countries: Development and Pilot Implementation of an App and Cross-Sectional Assessment of Attitudes and Behaviour Survey of Healthcare Workers and Patients
Source: MDPI journal article supplement (doi:10.3390/antibiotics9090555), 2020-08-29

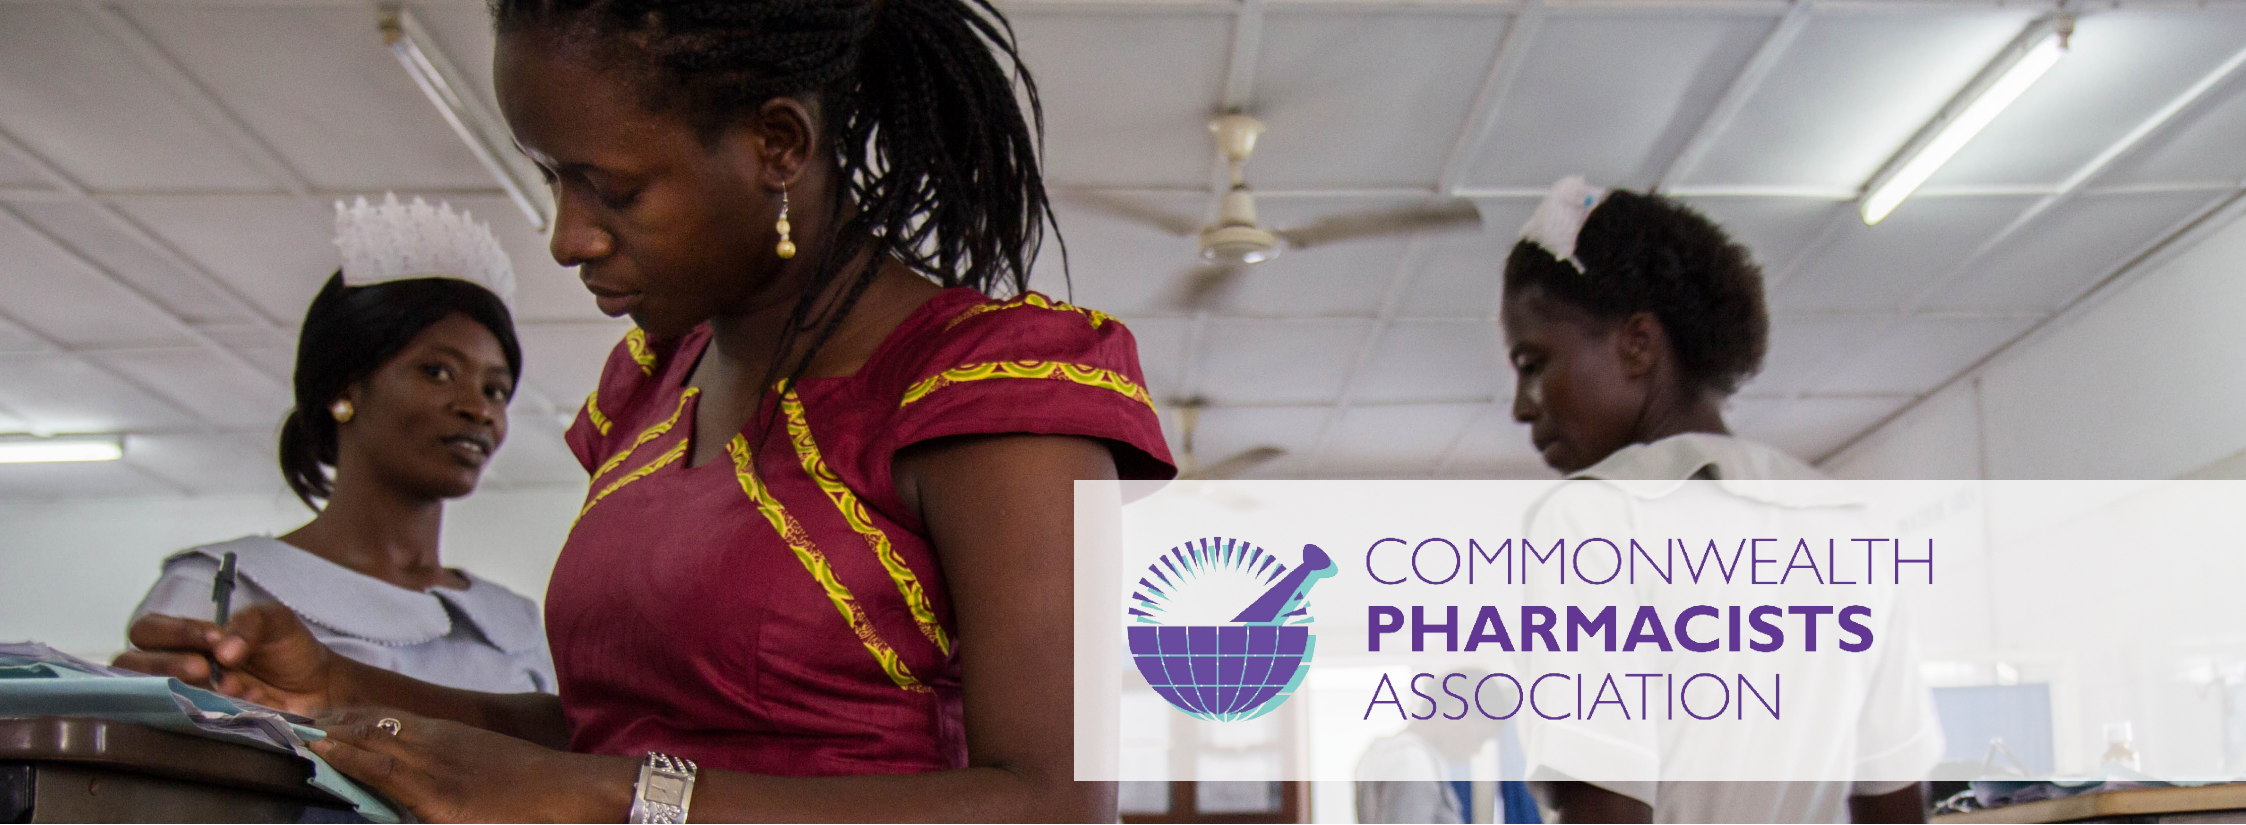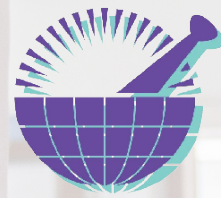

COMMONWEALTH  
**PHARMACISTS**  
ASSOCIATION

## **DID YOU KNOW...**

**YOUR DOCTOR, NURSE OR PHARMACIST IS ENSURING THE BEST DRUG AND MOST UP TO DATE CARE RECOMMENDED FOR YOU WHEN THEY USE THE MEDICINES INFORMATION APP.**

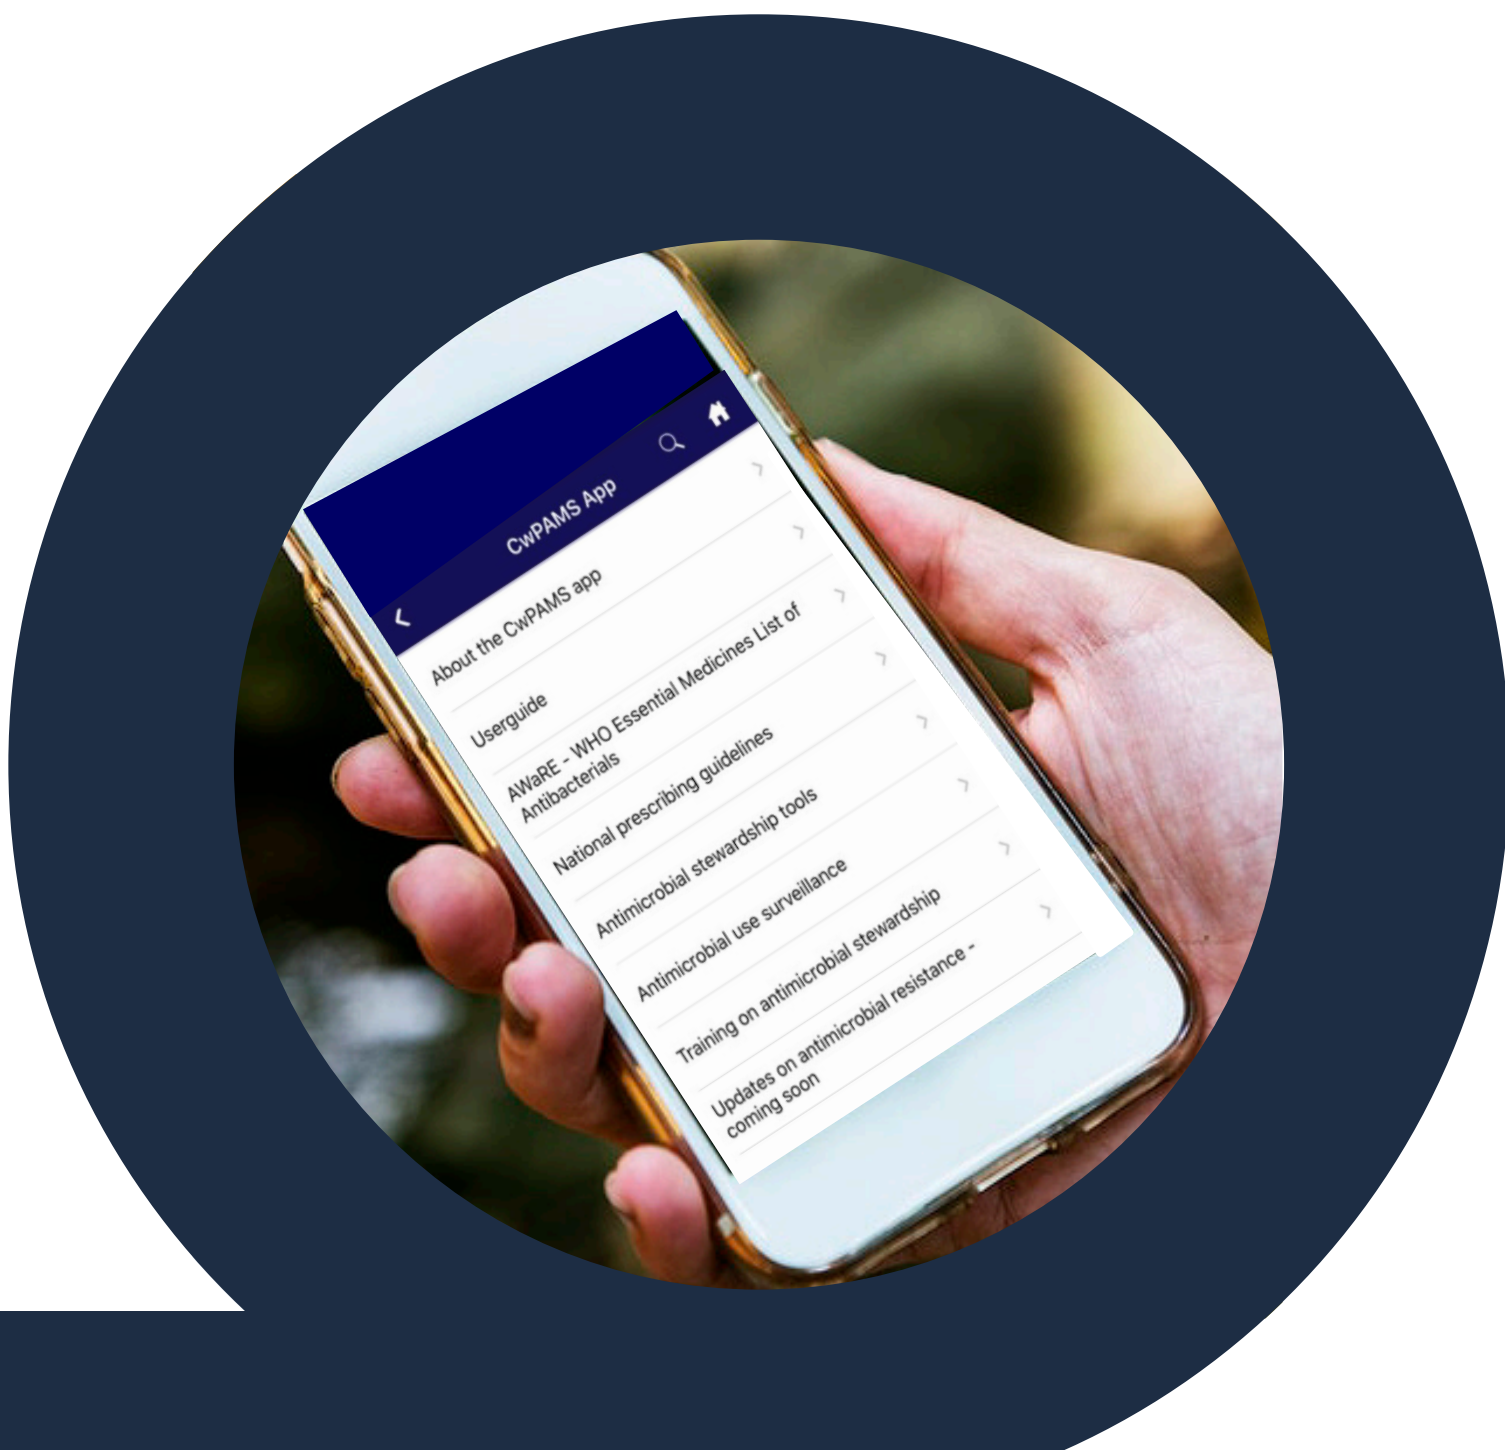

Supplement: s1 [file s1]
