# Supplementary material for: Improving Access to Antimicrobial Prescribing Guidelines in 4 African Countries: Development and Pilot Implementation of an App and Cross-Sectional Assessment of Attitudes and Behaviour Survey of Healthcare Workers and Patients
Source: MDPI journal article supplement (doi:10.3390/antibiotics9090555), 2020-08-29
Supplement: s1 [file s1]

# Survey on antimicrobial prescribing app in Ghana

## 1) Background information

Country.....

Grade .....

Specialty.....

Type of institution.....

Year of graduation .....

Profession (circle one): Doctor/Nurse/Pharmacist/Other

Which do you do most frequently in your role (circle one): prescribe / administer / dispense

## 2) How frequently do you access ANY FORM OF MEDICAL INFORMATION using the following:

|                               | More than<br>once a day  | Daily                    | Weekly                   | Monthly                  | Never                    |
|-------------------------------|--------------------------|--------------------------|--------------------------|--------------------------|--------------------------|
| A mobile phone                | <input type="checkbox"/> |
| A tablet                      | <input type="checkbox"/> |
| A computer                    | <input type="checkbox"/> |
| A pocket book                 | <input type="checkbox"/> |
| Printed posters               | <input type="checkbox"/> |
| Other (please state)<br>..... | <input type="checkbox"/> |

## 3) How frequently do you prescribe/administer or dispense antimicrobials?

|  | More than<br>once a day  | Daily                    | Weekly                   | Monthly                  | Never                    |
|--|--------------------------|--------------------------|--------------------------|--------------------------|--------------------------|
|  | <input type="checkbox"/> |

## 4) Please tick the most appropriate answers to the statements below. (pls tick one option per line)

|                                                                                                 | Strongly<br>disagree     | Disagree                 | Neither<br>agree nor<br>disagree | Agree                    | Strongly<br>agree        |
|-------------------------------------------------------------------------------------------------|--------------------------|--------------------------|----------------------------------|--------------------------|--------------------------|
| Standard antimicrobial treatment guidelines are easy to access                                  | <input type="checkbox"/> | <input type="checkbox"/> | <input type="checkbox"/>         | <input type="checkbox"/> | <input type="checkbox"/> |
| My seniors' preferences guide antimicrobial prescribing more than standard treatment guidelines | <input type="checkbox"/> | <input type="checkbox"/> | <input type="checkbox"/>         | <input type="checkbox"/> | <input type="checkbox"/> |
| Standard antimicrobial treatment guidelines don't apply to my patients                          | <input type="checkbox"/> | <input type="checkbox"/> | <input type="checkbox"/>         | <input type="checkbox"/> | <input type="checkbox"/> |
| I prefer to use non-standard treatment guidelines to guide my antimicrobial prescribing         | <input type="checkbox"/> | <input type="checkbox"/> | <input type="checkbox"/>         | <input type="checkbox"/> | <input type="checkbox"/> |
| I am concerned about the emergence of drug-resistant infections                                 | <input type="checkbox"/> | <input type="checkbox"/> | <input type="checkbox"/>         | <input type="checkbox"/> | <input type="checkbox"/> |

**5) Do you carry a smartphone with you at work?**

Yes    No

**6) Which operating system does it run on?**

iPhone

Android

Windows Phone

Blackberry

Other (please state)

.....

**7) How frequently did/do you access the following sources of information on ANTIMICROBIAL PRESCRIBING? (Tick one option per line)**

|                                               | More than once a day     | Daily                    | Weekly                   | Monthly                  | Never                    |
|-----------------------------------------------|--------------------------|--------------------------|--------------------------|--------------------------|--------------------------|
| CwPAMS App                                    | <input type="checkbox"/> |
| Printed copy of Standard treatment guidelines | <input type="checkbox"/> |
| BNF / National guidelines                     | <input type="checkbox"/> |
| Microbiology / Infectious Diseases advice     | <input type="checkbox"/> |
| Pharmacists                                   | <input type="checkbox"/> |
| Senior colleagues                             | <input type="checkbox"/> |
| Other junior doctors                          | <input type="checkbox"/> |
| Internet search engines (e.g. Google)         | <input type="checkbox"/> |
| Other (please state)                          | <input type="checkbox"/> |
| .....                                         |                          |                          |                          |                          |                          |

**8a) Are you aware that the infection treatment from the Ghana Standard Treatment guidelines is available as an Smartphone App? (circle one)**

Yes

No

**8b) Have you downloaded the app? (circle one)**

Yes

No

**9) Only answer this question IF you have downloaded the app - How frequently do you now access the following sources of information on ANTIMICROBIAL PRESCRIBING? (Tick one option per line)**

|                                               | More than once a day     | Daily                    | Weekly                   | Monthly                  | Never                    |
|-----------------------------------------------|--------------------------|--------------------------|--------------------------|--------------------------|--------------------------|
| CwPAMS App                                    | <input type="checkbox"/> |
| Printed copy of standard treatment guidelines | <input type="checkbox"/> |
| BNF / National guidelines                     | <input type="checkbox"/> |
| Microbiology / Infectious Diseases advice     | <input type="checkbox"/> |
| Pharmacists                                   | <input type="checkbox"/> |
| Senior colleagues                             | <input type="checkbox"/> |
| Other junior doctors                          | <input type="checkbox"/> |

Internet search engines (e.g. Google)

☐☐☐☐☐

Other (please state)

☐☐☐☐☐

.....

10) If you have downloaded the app but not currently using regularly please share what the challenges are:

---



---

11) Please tick the most appropriate answers to the statements below about THE CwPAMS SMART PHONE APP (Tick one option per line)

|                                                                                              | Strongly disagree        | Disagree                 | Neither agree nor disagree | Agree                    | Strongly agree           |
|----------------------------------------------------------------------------------------------|--------------------------|--------------------------|----------------------------|--------------------------|--------------------------|
| I have found the app useful                                                                  | <input type="checkbox"/> | <input type="checkbox"/> | <input type="checkbox"/>   | <input type="checkbox"/> | <input type="checkbox"/> |
| The app is easy to navigate                                                                  | <input type="checkbox"/> | <input type="checkbox"/> | <input type="checkbox"/>   | <input type="checkbox"/> | <input type="checkbox"/> |
| The content of the app is relevant to my - patient population                                | <input type="checkbox"/> | <input type="checkbox"/> | <input type="checkbox"/>   | <input type="checkbox"/> | <input type="checkbox"/> |
| The app is the best way to access standard antimicrobial treatment guidelines                | <input type="checkbox"/> | <input type="checkbox"/> | <input type="checkbox"/>   | <input type="checkbox"/> | <input type="checkbox"/> |
| I would like to see all standard antimicrobial treatment guidelines on the app               | <input type="checkbox"/> | <input type="checkbox"/> | <input type="checkbox"/>   | <input type="checkbox"/> | <input type="checkbox"/> |
| The app encourages me to document the <u>indication</u> for antimicrobials on the drug chart | <input type="checkbox"/> | <input type="checkbox"/> | <input type="checkbox"/>   | <input type="checkbox"/> | <input type="checkbox"/> |
| The app encourages me to document the <u>duration</u> for antimicrobials on the drug chart   | <input type="checkbox"/> | <input type="checkbox"/> | <input type="checkbox"/>   | <input type="checkbox"/> | <input type="checkbox"/> |
| The app encourages me to challenge inappropriate prescribing by others                       | <input type="checkbox"/> | <input type="checkbox"/> | <input type="checkbox"/>   | <input type="checkbox"/> | <input type="checkbox"/> |
| I feel comfortable using a smart phone on a ward round                                       | <input type="checkbox"/> | <input type="checkbox"/> | <input type="checkbox"/>   | <input type="checkbox"/> | <input type="checkbox"/> |
| I feel comfortable accessing the app at the patient's bedside                                | <input type="checkbox"/> | <input type="checkbox"/> | <input type="checkbox"/>   | <input type="checkbox"/> | <input type="checkbox"/> |
| The app has increased my awareness of antimicrobial stewardship                              | <input type="checkbox"/> | <input type="checkbox"/> | <input type="checkbox"/>   | <input type="checkbox"/> | <input type="checkbox"/> |

**12) Please, rate how useful you found each of the following sections in the app (Tick one option per line)**

|                                                            | Very useful              | Useful                   | Not useful               | Didn't use               |
|------------------------------------------------------------|--------------------------|--------------------------|--------------------------|--------------------------|
| The WHO Essential Medicines list section                   | <input type="checkbox"/> | <input type="checkbox"/> | <input type="checkbox"/> | <input type="checkbox"/> |
| The country specific standard treatment guidelines section | <input type="checkbox"/> | <input type="checkbox"/> | <input type="checkbox"/> | <input type="checkbox"/> |
| The AMS resource section                                   | <input type="checkbox"/> | <input type="checkbox"/> | <input type="checkbox"/> | <input type="checkbox"/> |
| The Global PPS tools section                               | <input type="checkbox"/> | <input type="checkbox"/> | <input type="checkbox"/> | <input type="checkbox"/> |
| The IPC tools section                                      | <input type="checkbox"/> | <input type="checkbox"/> | <input type="checkbox"/> | <input type="checkbox"/> |

**13) Do you have any suggestions for improving the content of the CwPAMS smart phone app?**

---

**14) Please detail any other comments you have about the CwPAMS antimicrobial smart phone app**

---

**15) How many other medical apps do you use on a regular basis? Please state their names.**

---

**Please use the section below to share any other feedback or comments:**
