# Supplementary material for: Improving Access to Antimicrobial Prescribing Guidelines in 4 African Countries: Development and Pilot Implementation of an App and Cross-Sectional Assessment of Attitudes and Behaviour Survey of Healthcare Workers and Patients
Source: MDPI journal article supplement (doi:10.3390/antibiotics9090555), 2020-08-29
Supplement: s1 [file s1]

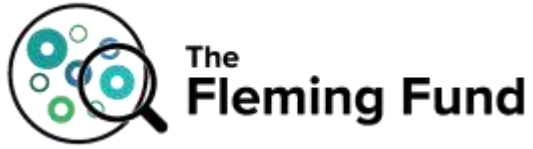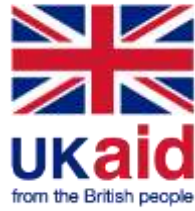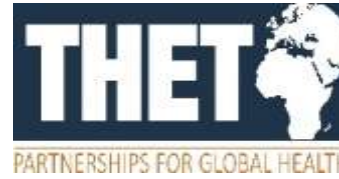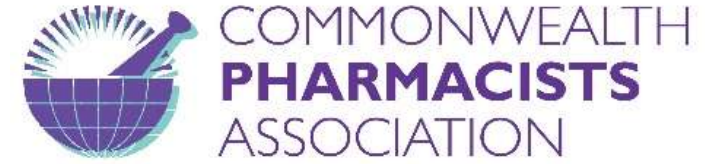

Introducing....

The new  
CwPAMS  
prescribing  
app

Medicines  
management  
information  
at your  
fingertips!

Tweet us!  
#CwPAMS

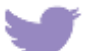

# The CwPAMS Microguide app

The CwPAMS app has been developed to provide easy access to information that is vital to use antimicrobials appropriately.

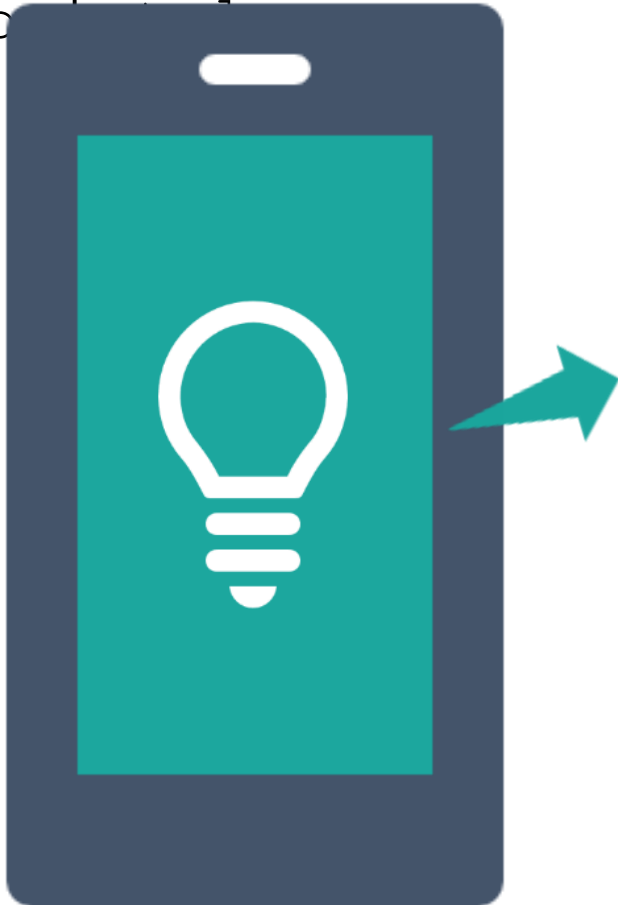

It has many benefits...

- Easy download and Offline mode for poor internet connectivity
- All the information you need for antimicrobial prescribing and more at your fingertips
- You can tailor 'favourite' pages for quick access

- COMPLETELY FREE

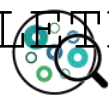

The Fleming Fund

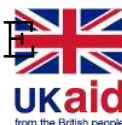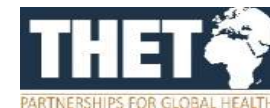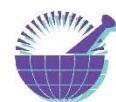

COMMONWEALTH  
PHARMACISTS  
ASSOCIATION

# Medicines information management

- The app provides World Health Organisation (WHO) and National medicines information

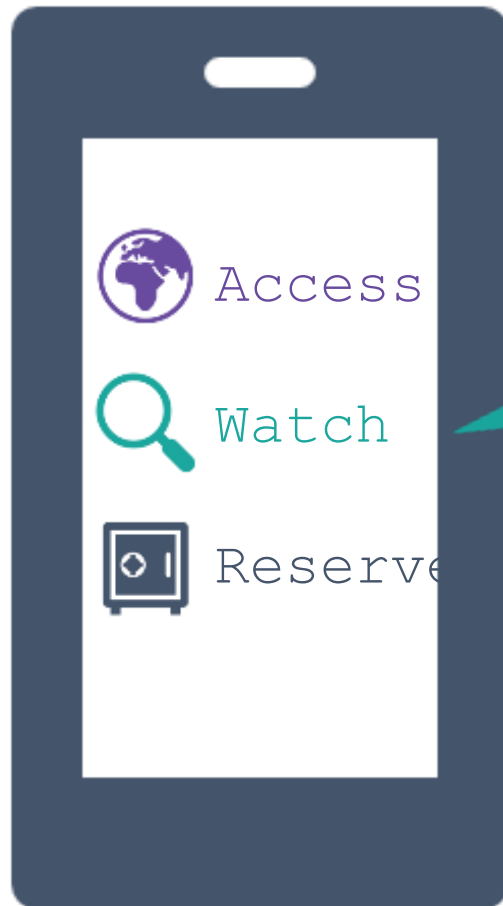

WHO essential medicines lists on antimicrobials

- Antibiotics (Access, Watch, Reserve - AWaRe)
- AntiTB, antifungal and antimalarial medicines

National standard treatment guidelines on antimicrobials

# Antimicrobial stewardship tools

- Tools to support antimicrobial stewardship such as

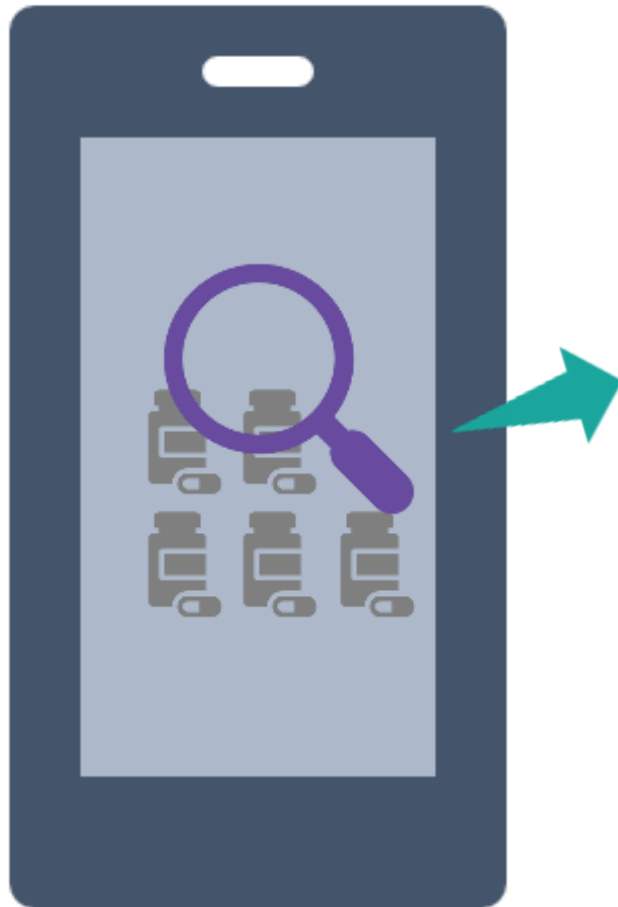

- AMS Checklist tool
- AMS training resources
- Infection prevention and control (IPC) and water, sanitation and hygiene (WASH) training and assessment tools
- Global PPS tools for surveillance of antimicrobials

## How to download – three easy steps

1. In your app store download the Microguide app
2. Set up a user and select Commonwealth Pharmacists' Association as institution
3. Select the CwPAMS guide and download (It will automatically update as new versions come available)

DESKTOP MODE: Available on computers via the link:

<https://viewer.microguide.global/CPA/CWPAMS>

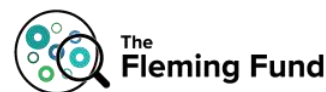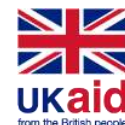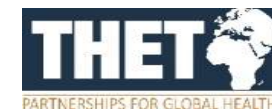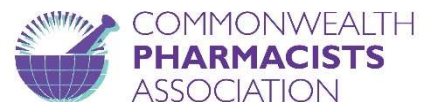

## CwPAMS App

|                                                        |   |
|--------------------------------------------------------|---|
| About the CwPAMS app                                   | > |
| Userguide                                              | > |
| AWaRE - WHO Essential Medicines List of Antibacterials | > |
| National prescribing guidelines                        | > |
| Antimicrobial stewardship tools                        | > |
| Antimicrobial use surveillance                         | > |
| Training on antimicrobial stewardship                  | > |
| Updates on antimicrobial resistance - coming soon      | > |

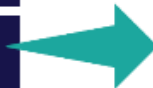

## National prescribing guidelines

|                                               |   |
|-----------------------------------------------|---|
| Ghana antimicrobial prescribing guidelines    | > |
| Tanzania antimicrobial prescribing guidelines | > |
| Uganda antimicrobial prescribing guidelines   | > |
| Zambia antimicrobial prescribing guidelines   | > |

## Ghana antimicrobial prescribing guidelines

|                                         |   |
|-----------------------------------------|---|
| About                                   | > |
| Disorders of the gastrointestinal tract | > |
| Disorders of the liver                  | > |
| Nutritional disorders                   | > |
| Hematological disorders                 | > |
| Immunisable diseases                    | > |
| Problems of the new born (neonate)      | > |

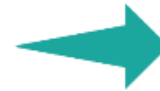

## Immunisable diseases

|                                       |   |
|---------------------------------------|---|
| Pertussis                             | > |
| Tetanus                               | > |
| Diphtheria                            | > |
| Haemophilus Influenzae type b Disease | > |
| Pneumococcal Disease                  | > |
| Hepatitis                             | > |

## Eradication of bacteria in a patient diagnosed to have tetanus

### Eradication of bacteria in a patient diagnosed to have tetanus

#### 1st Line Treatment

Evidence Rating: [A]

**Metronidazole, IV,**

Adults

500 mg 6 hourly for 7-10 days

Children

> 1 month 7.5 mg/kg 8 hourly for 7-10 day

Neonates

> 7 days; 7.5 mg/kg 12 hourly

< 7 days; 7.5 mg/kg 48 hourly

#### 2nd Line Treatment

Evidence Rating: [B]

**Benzympenicillin, IV,**

Adults

50,000 units/kg stat, then 4 MU 6 hourly for 5 days

Children

50,000 units/kg 6 hourly for 5 days

Neonates

250,000 units 6 hourly for 7 days

And

Gentamicin, IV, (neonates only), 4 mg/kg 24 hourly
