# Supplementary material for: Improving Access to Antimicrobial Prescribing Guidelines in 4 African Countries: Development and Pilot Implementation of an App and Cross-Sectional Assessment of Attitudes and Behaviour Survey of Healthcare Workers and Patients
Source: MDPI journal article supplement (doi:10.3390/antibiotics9090555), 2020-08-29

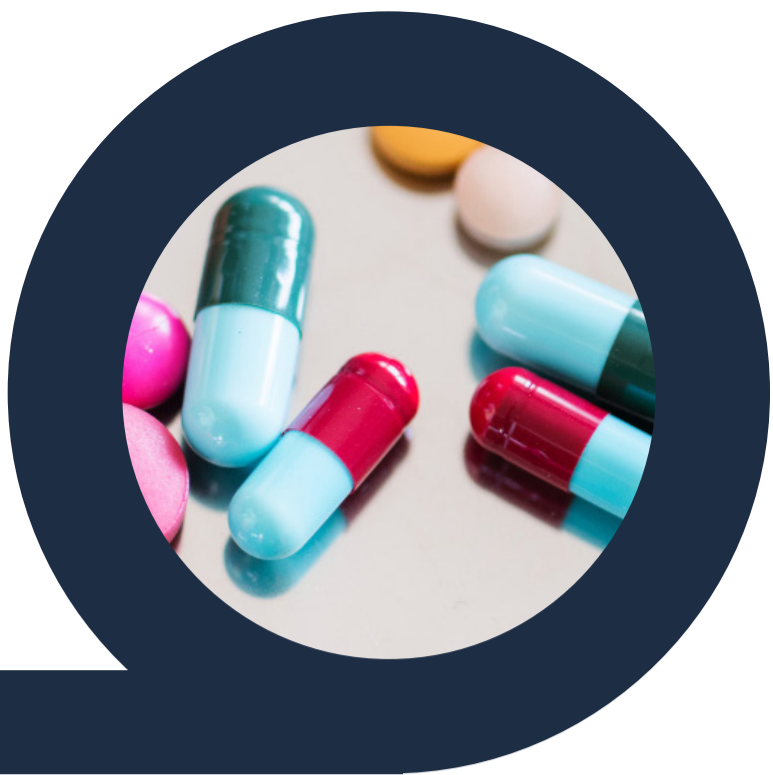

# GHANA

## ANTIMICROBIAL PRESCRIBING GUIDELINES AT YOUR FINGERTIPS!

The CwPAMS app provides easy access to medicines management information to support appropriate antimicrobial stewardship with these essential features:

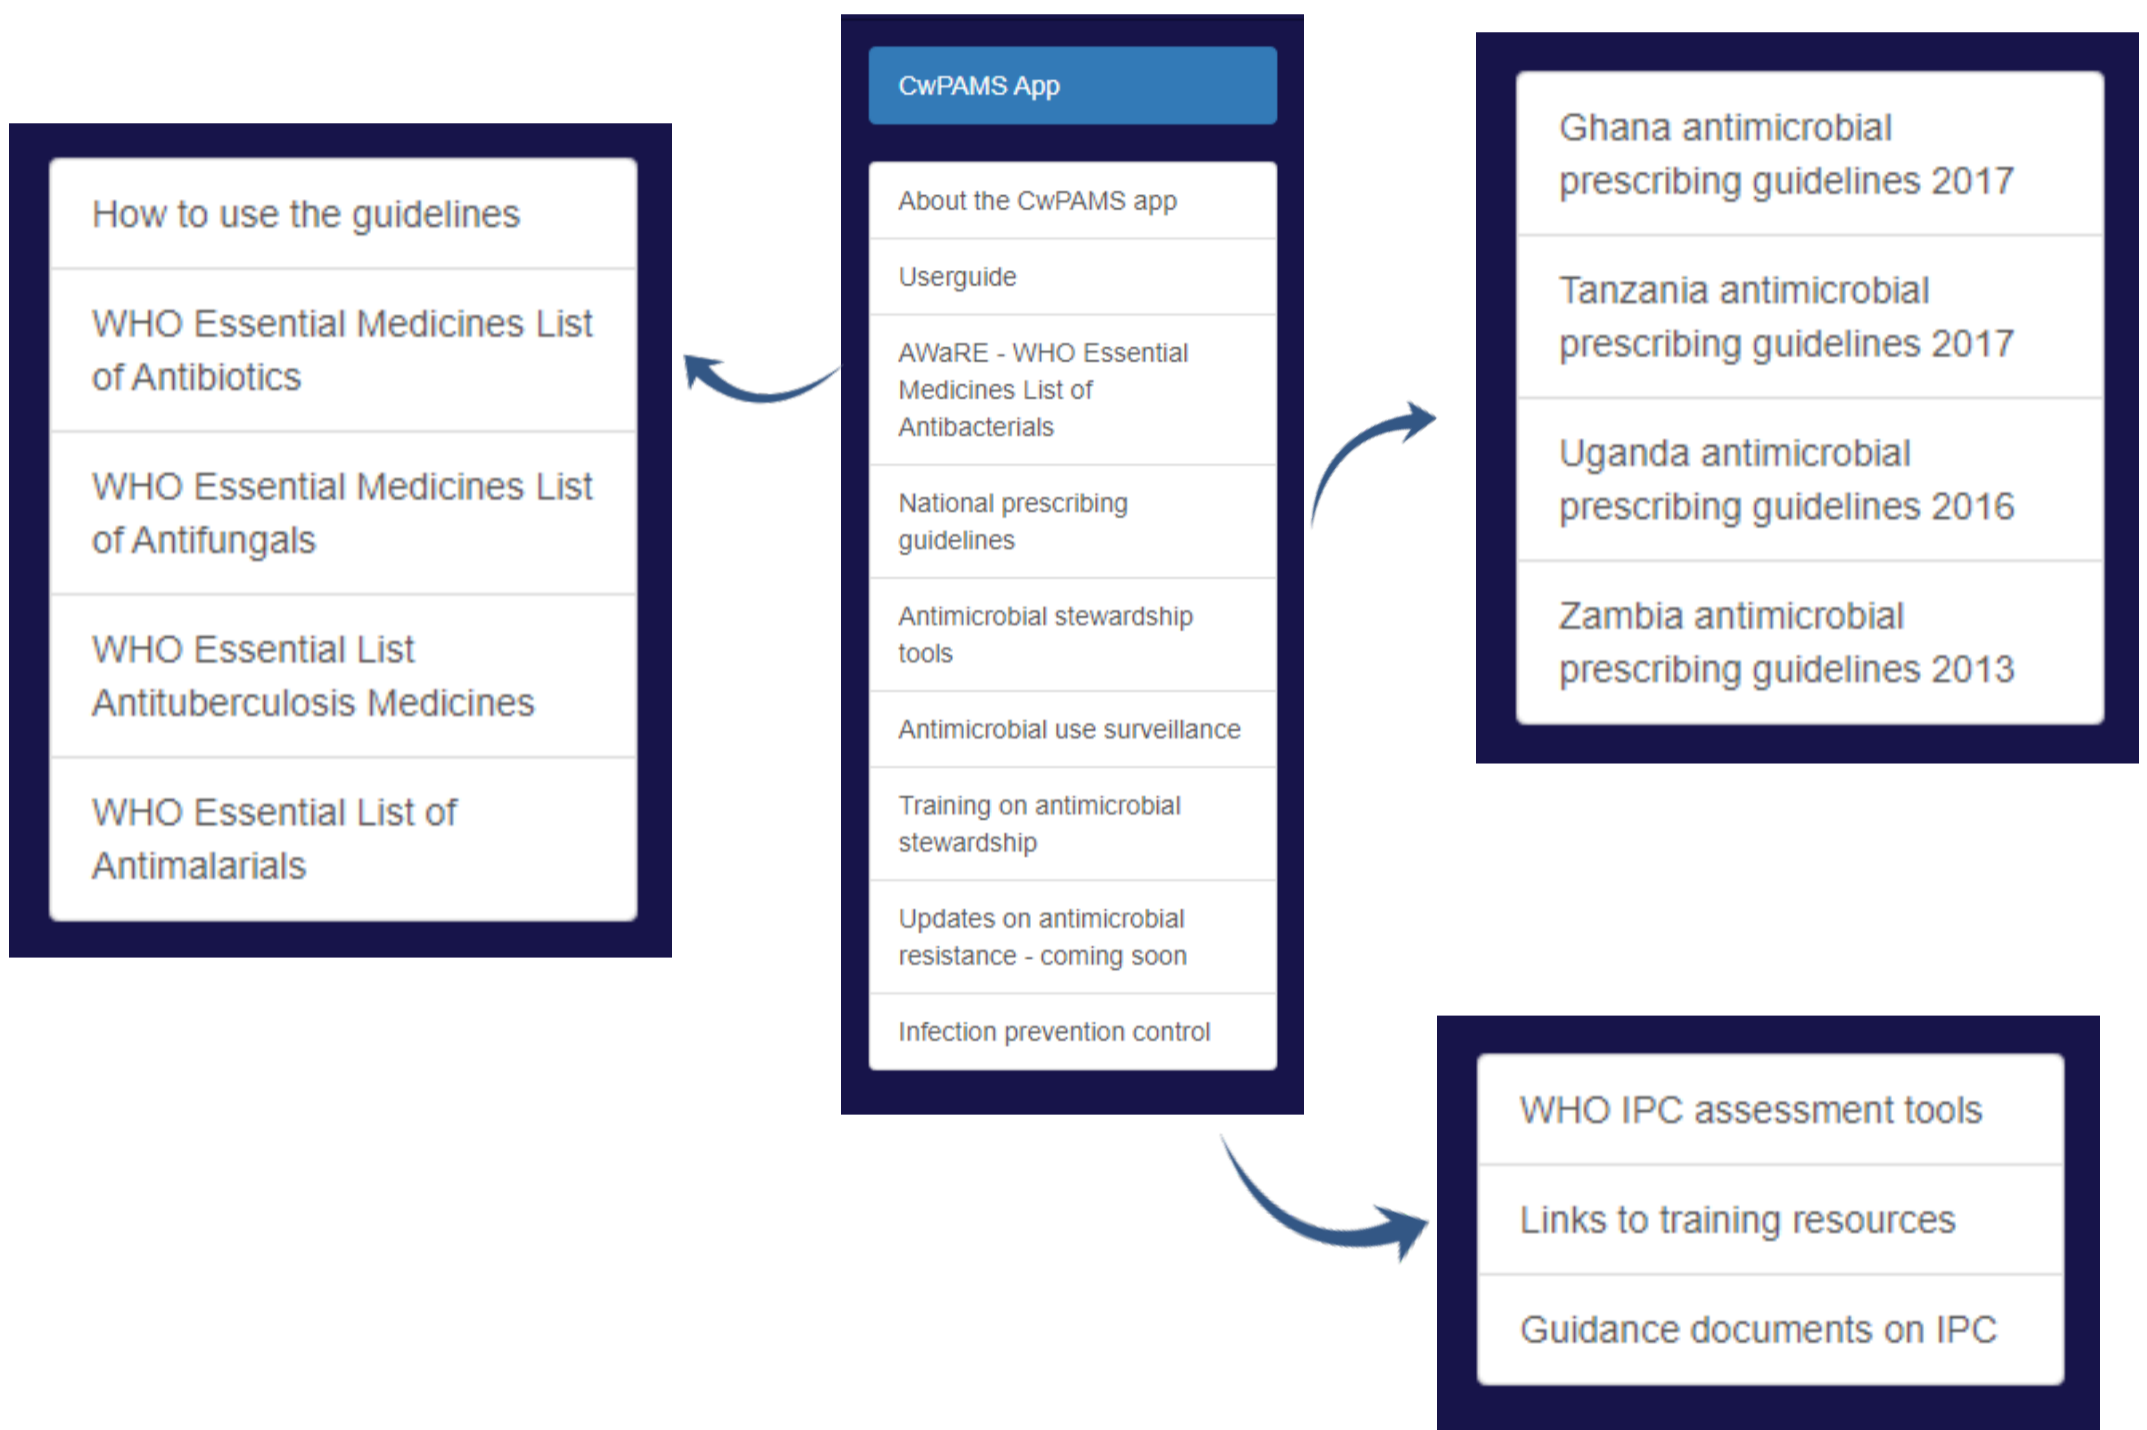

### How to download:

1. Search for MicroGuide in app store - download
2. Click on the following: get guide - select medical organisation - click inside circle (Commonwealth Pharmacists Association).
3. Click CwPAMS app, finally, on top left click get selected guide.

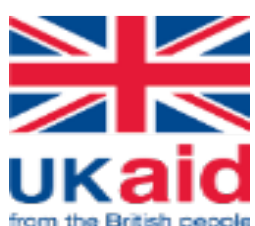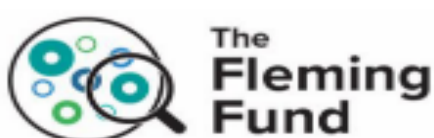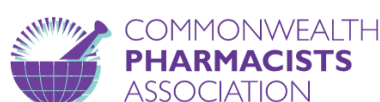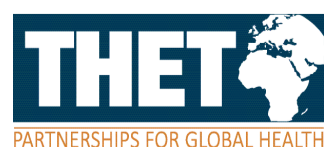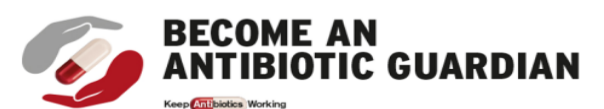

Supplement: s1 [file s1]
