# Supplementary material for: Improving Access to Antimicrobial Prescribing Guidelines in 4 African Countries: Development and Pilot Implementation of an App and Cross-Sectional Assessment of Attitudes and Behaviour Survey of Healthcare Workers and Patients
Source: MDPI journal article supplement (doi:10.3390/antibiotics9090555), 2020-08-29
Supplement: s1 [file s1]

## Survey on antimicrobial prescribing app in Ghana

### Age:

- ☐ 18-25yrs      ☐ 26-35yrs      ☐ 36-45yrs  
☐ 46-55yrs      ☐ 56-67yrs      ☐ 68yrs and above

### Gender

- ☐ Male      ☐ Female

### Highest level of education obtained

- ☐ Basic primary education  
☐ Secondary education  
☐ Tertiary education (Higher than secondary)

### Occupation

.....

### Has a physician ever used a smart phone app while attending to you?

Yes ☐      No ☐

### What do you feel about the following?

|                                                                                       | Strongly agree | Agree | Neutral | Disagree | Strongly disagree |
|---------------------------------------------------------------------------------------|----------------|-------|---------|----------|-------------------|
| I am pleased with my doctor accessing a smart phone mobile app while attending to me. |                |       |         |          |                   |
| Using smart phone apps will increase the quality of healthcare offered by my doctor.  |                |       |         |          |                   |
| The use of smart phone apps quickens access to health care.                           |                |       |         |          |                   |
| The use of smart phone apps increases quality of health care delivery.                |                |       |         |          |                   |

### Do you have any reservations/concerns with a doctor's use of a mobile app while attending to you?

Yes ☐      No ☐

**If yes, what are your concerns?**

|                                                                                        | Strongly agree | Agree | Neutral | Disagree | Strongly disagree |
|----------------------------------------------------------------------------------------|----------------|-------|---------|----------|-------------------|
| The doctor may not be competent enough.                                                |                |       |         |          |                   |
| It is a distraction to healthcare provision.                                           |                |       |         |          |                   |
| My data may not be protected /secured.                                                 |                |       |         |          |                   |
| Mobile devices may not be technically reliable enough.                                 |                |       |         |          |                   |
| The use of smart phones /mobile apps might be complicated when it comes to healthcare. |                |       |         |          |                   |

**Any additional concerns? Kindly state them**

.....

.....

.....

.....

**Which of the following would you prefer to have your physician use?**

- |                                                   |                                           |
|---------------------------------------------------|-------------------------------------------|
| <input type="checkbox"/> A smart mobile phone app | <input type="checkbox"/> A tablet         |
| <input type="checkbox"/> A computer/laptop        | <input type="checkbox"/> A reference book |
