# Supplementary material for: Improving Access to Antimicrobial Prescribing Guidelines in 4 African Countries: Development and Pilot Implementation of an App and Cross-Sectional Assessment of Attitudes and Behaviour Survey of Healthcare Workers and Patients
Source: MDPI journal article supplement (doi:10.3390/antibiotics9090555), 2020-08-29
Supplement: s1 [file s1]

# INTRODUCING...

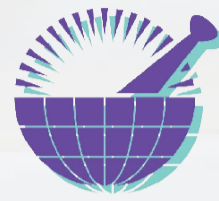

COMMONWEALTH  
**PHARMACISTS**  
ASSOCIATION

## The new CwPAMS Infection App

Download **MicroGuide** from your App store and select Commonwealth Pharmacists Association (CPA) as your institution.

- Search for **MicroGuide** in app store - download
- Click on the following: get guide - select medical organisation - click inside circle (**Commonwealth Pharmacists Association**). Click CwPAMS app, finally, on top left click get selected guide

*...Instant access to  
up-to-date national guidelines  
at  
the point of care.*

- ✓ Improves patient care
- ✓ Saves time
- ✓ Increases diagnostic accuracy
- ✓ Helps regulate prescribing practices
- ✓ Enhances physician efficiency.
