# Supplementary material for: Improving Access to Antimicrobial Prescribing Guidelines in 4 African Countries: Development and Pilot Implementation of an App and Cross-Sectional Assessment of Attitudes and Behaviour Survey of Healthcare Workers and Patients
Source: Antibiotics (Basel). 2020 Aug 29;9(9):555. doi: 10.3390/antibiotics9090555 (PMC7558264; doi:10.3390/antibiotics9090555)
Supplement: Supplementary file 1 [file antibiotics-09-00555-s001.zip]

Archive with 6 entries (6 files):
- S1_ 'Communications presentation on the CwPAMS App (1).pptx'.pdf
- S3_AppLaunch - generic.pdf
- S3_AppLaunch - patient poster.pdf
- S3_AppLaunch_1_Ghana.pdf
- S4_CwPAMS App-Patient questionnaire.pdf
- S4_CwPAMS App_LAUNCH-HCW Questionnaire.pdf
